# Supplementary material for: Applying the chemical bonding theory of single crystal growth to a Gd3Ga5O12Czochralski growth system: both thermodynamic and kinetic controls of the mesoscale process during single crystal growth
Source: Royal Society of Chemistry journal article supplement (doi:10.1039/c5ce00291e), 2015-01-01
Supplement: c5ce00291e1.pdf [file c5ce00291e1.pdf]

## Supporting Information

### **Applying the chemical bonding theory of single crystal growth to Gd<sub>3</sub>Ga<sub>5</sub>O<sub>12</sub> Czochralski growth system: both thermodynamic and kinetic controls of the mesoscale process during single crystal growth**

Yan Wang <sup>a</sup>, Congting Sun,<sup>b</sup> Chaoyang Tu<sup>a\*</sup>, Dongfeng Xue<sup>b\*</sup>

*<sup>a</sup> Key Laboratory of Optoelectronic Materials Chemistry and Physics, Fujian  
Institute of Research on the Structure of Matter, Chinese Academy of Sciences,  
Fuzhou City, Fujian Province, 350002, PR China*

*<sup>b</sup> State Key Laboratory of Rare Earth Resource Utilization, Changchun Institute  
of Applied Chemistry, Chinese Academy of Sciences, Changchun 130022, China*

\*Corresponding author. E-mail: dongfeng@ciac.ac.cn

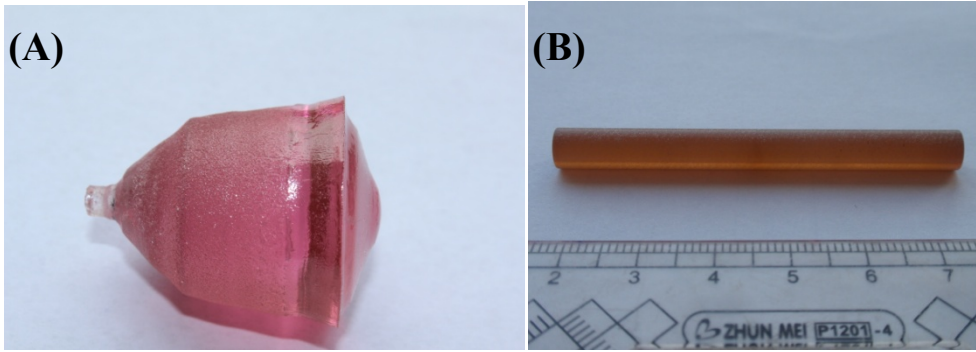

Figure S1 Photos of Er:GGG crystal (A) and Er,Pr:GGG crystal rod (B).
